# Supplementary material for: Conjugated linoleic acid induces an atheroprotective macrophage MΦ2 phenotype and limits foam cell formation
Source: Springer Nature journal article supplement (doi:10.1186/s12950-015-0060-9), 2015-02-18
Supplement: MOESM3 [file 9763634]

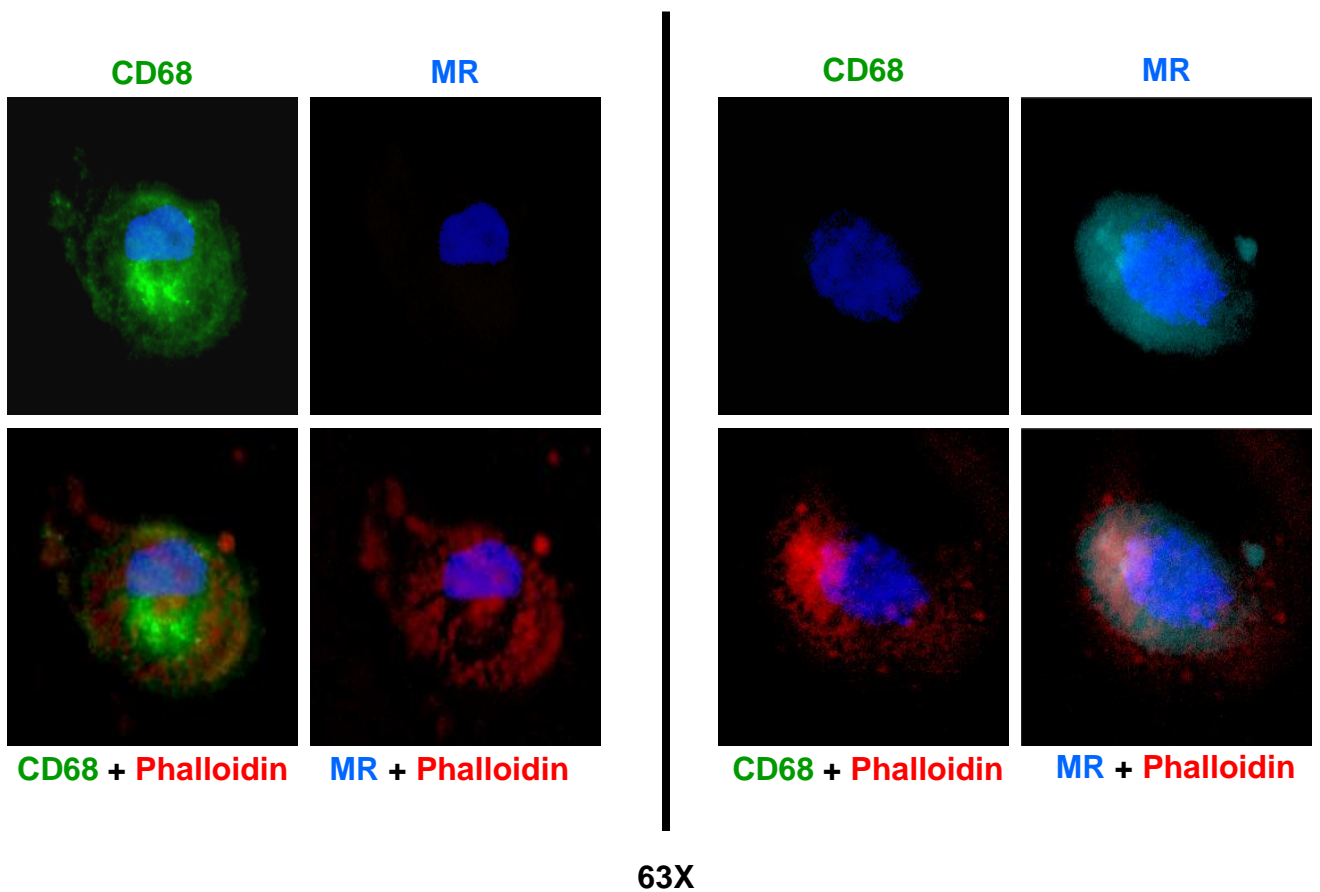

**Additional file 3 - Specificity of signals for co-incubation of CD68 and MR in HPBMC-derived macrophages. a)** Micrographs show positive staining at 488nm (top left panel) and no staining at 568nm with cells incubated with CD68 + AlexaFluor 488 antibodies (top left panel, green). **b)** Positive staining at 568nm (top right panel) and no staining at 488nm with cells incubated with MR + AlexaFluor 568 antibodies (top right panel, cyan). Bottom panels indicates co-incubation of CD68 or MR with F-actin stained with AlexaFluor 647-conjugated Phalloidin (red). Nuclei are DAPI stained (blue)
