# Supplementary material for: Conjugated linoleic acid induces an atheroprotective macrophage MΦ2 phenotype and limits foam cell formation
Source: Springer Nature journal article supplement (doi:10.1186/s12950-015-0060-9), 2015-02-18
Supplement: MOESM4 [file 9763634]

**a**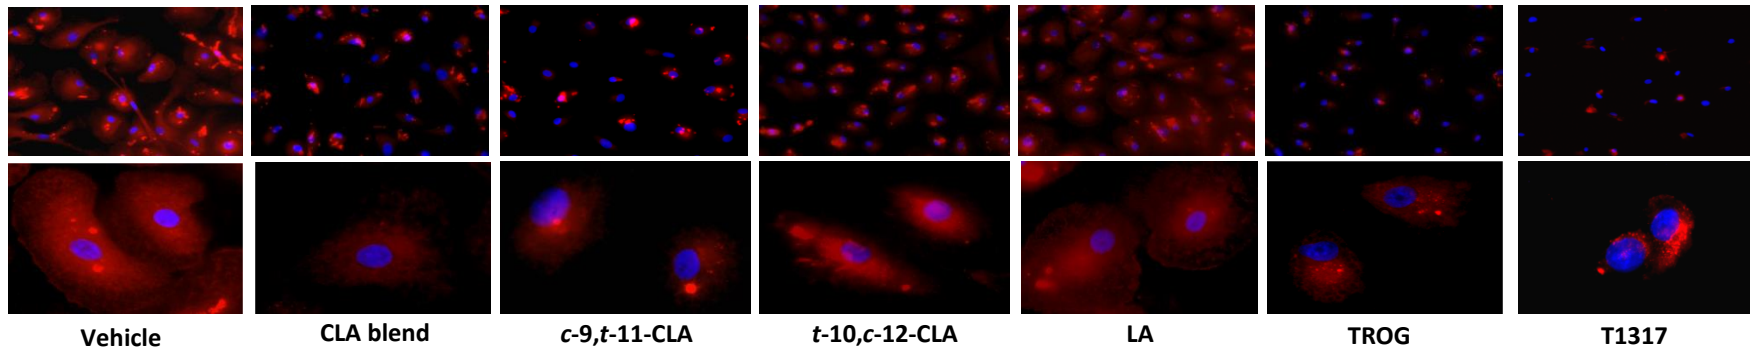**b**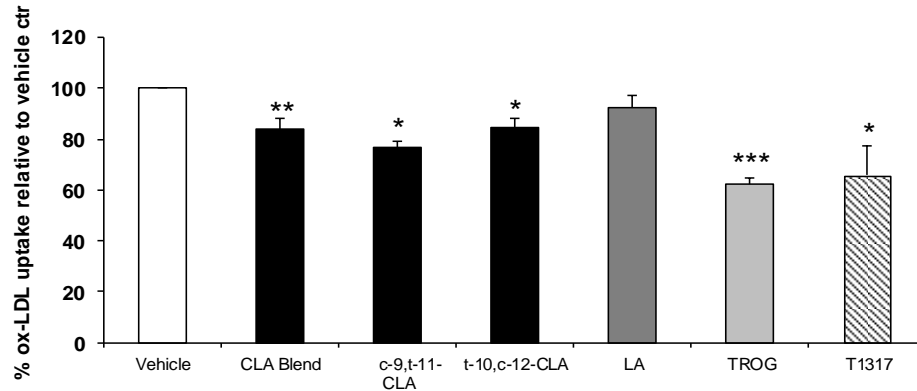

**Additional file 4. CLA reduces foam cell formation in primary human cells.** HPBMC-derived MCSF-induced macrophages were treated for 48 hrs with CLA or controls and then loaded with 50 ug/ml Dil-ox-LDL for 4 hrs to induce foam cell formation. Both CLA isomers and their blend inhibit ox-LDL accumulation, as shown by immunofluorescence **(a)** and quantified by spectrophotometric measurement **(b)** of ox-LDL fluorescence signal (adjusted per cell number), *via* a PPAR- $\gamma$  (TROG) and LXR- $\alpha$  (T1317) dependent mechanism. 20x and 63x magnification of DAPI and Dil-ox-LDL stained foam cells are shown in **(a)**. Micrographs are representative of three independent experiments. Data are expressed as mean % uptake  $\pm$  SEM where \* =  $p < 0.05$ , \*\* =  $p < 0.01$ , \*\*\* =  $p < 0.001$  vs DMSO vehicle control
