# Supplementary material for: Conjugated linoleic acid induces an atheroprotective macrophage MΦ2 phenotype and limits foam cell formation
Source: Springer Nature journal article supplement (doi:10.1186/s12950-015-0060-9), 2015-02-18
Supplement: MOESM5 [file 9763634]

**a**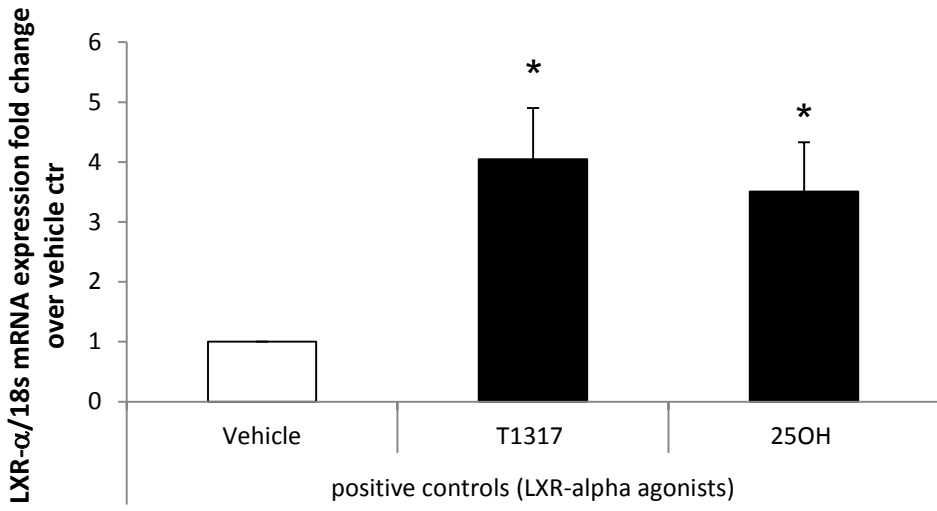**b**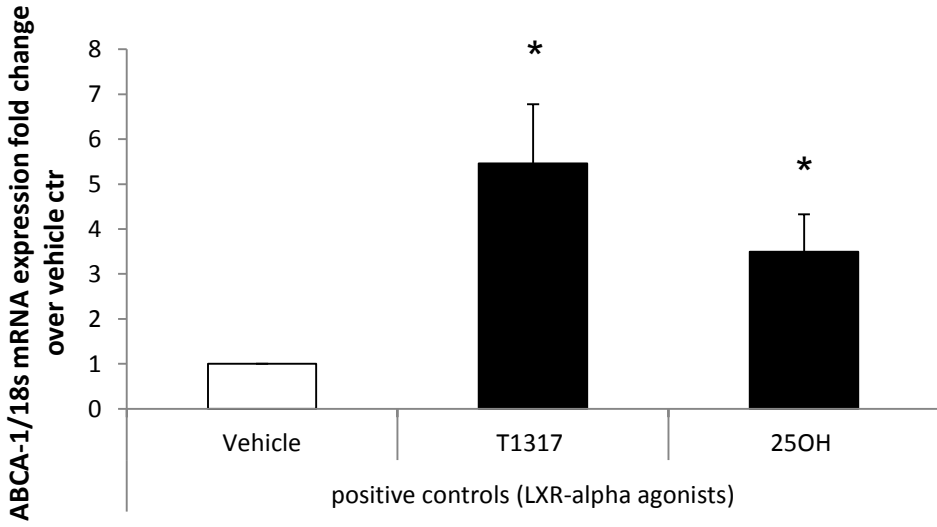

**Additional file 5. LXR- $\alpha$  agonists increase LXR $\alpha$  and target gene ABCA-1 expression.** RT-PCR analysis of **(a)** LXR- $\alpha$  and **(b)** ABCA-1 mRNA expression, following treatment of HPBMC-derived macrophages with LXR- $\alpha$  agonists (T1317 and 25-OH) used as positive controls in subsequent experiments. Statistical analysis of three independent experiments is expressed as fold change expression over control, where \* $p$ <0.05 vs DMSO vehicle control
